# Supplementary material for: Temperature and salinity, not acidification, predict near-future larval growth and larval habitat suitability of Olympia oysters in the Salish Sea
Source: PubMed Central journal article supplement (PMC7429507; doi:10.1038/s41598-020-69568-w), 2020-08-14
Supplement: 41598_2020_69568_MOESM1_ESM.pdf [file 41598_2020_69568_MOESM1_ESM.pdf]

Temperature and salinity, not acidification, predict near-future larval growth and larval habitat suitability of Olympia oysters in the Salish Sea

### **Supplementary Materials**

Jake Lawlor\*

Department of Biology, Shannon Point Marine Center, Western Washington University,  
Anacortes, WA, USA,

[jakealawlor@gmail.com](mailto:jakealawlor@gmail.com)

Shawn Arellano

Department of Biology, Shannon Point Marine Center, Western Washington University,  
Anacortes, WA, USA,

[shawn.arellano@wwu.edu](mailto:shawn.arellano@wwu.edu)

## Supplementary Figures and Tables

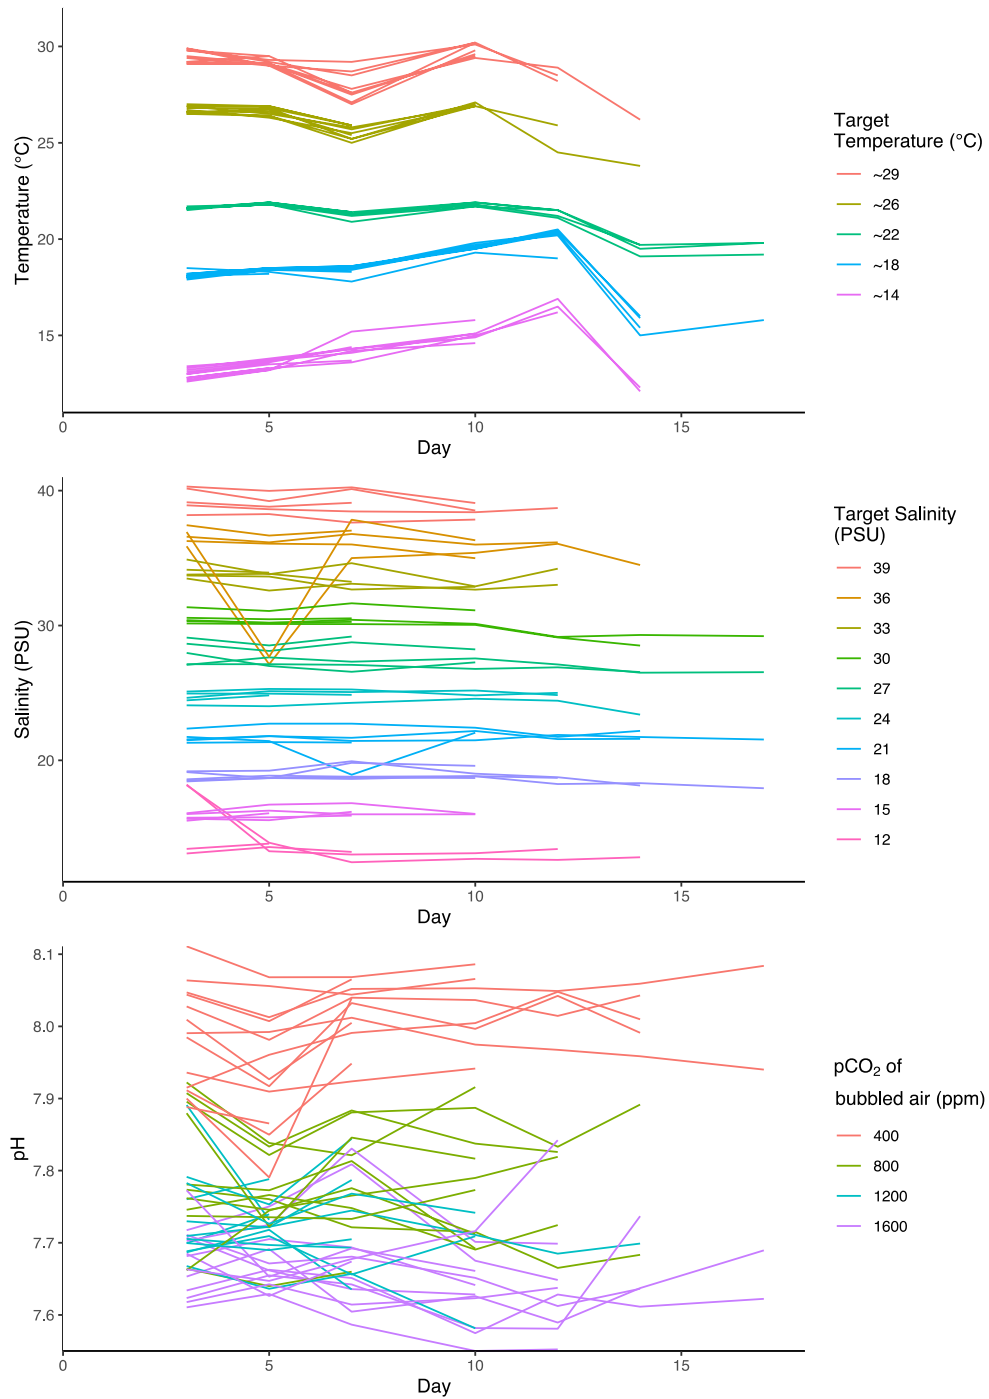

Supplementary Figure S1: Treatment cup variable stability over time from May 7-21, 2018. Each line represents one cup, colored by target treatment.

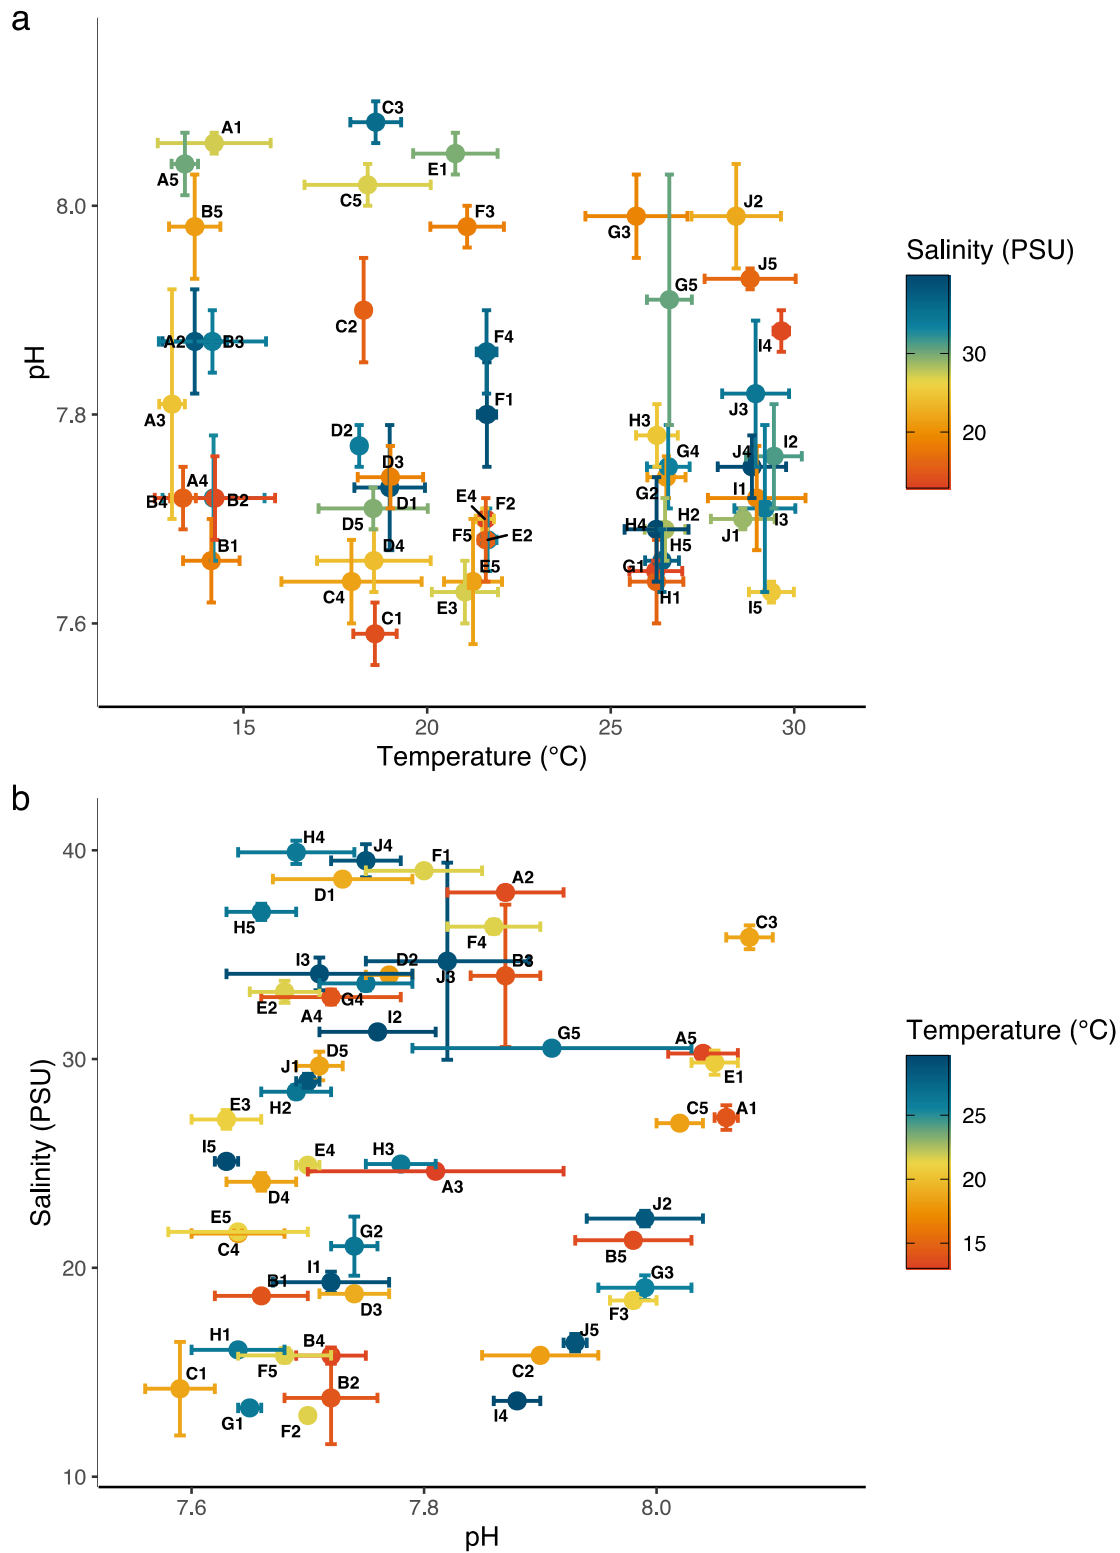

Supplementary Figure S2: Average treatment values of culture cups in the experiment organized by temperature and pH (a), and pH and salinity (b) as addendum to Fig 2, arranged by salinity and temperature. Error bars represent the standard deviation of axis variables for the duration of the cup's inclusion in the experiment (3-17 days).

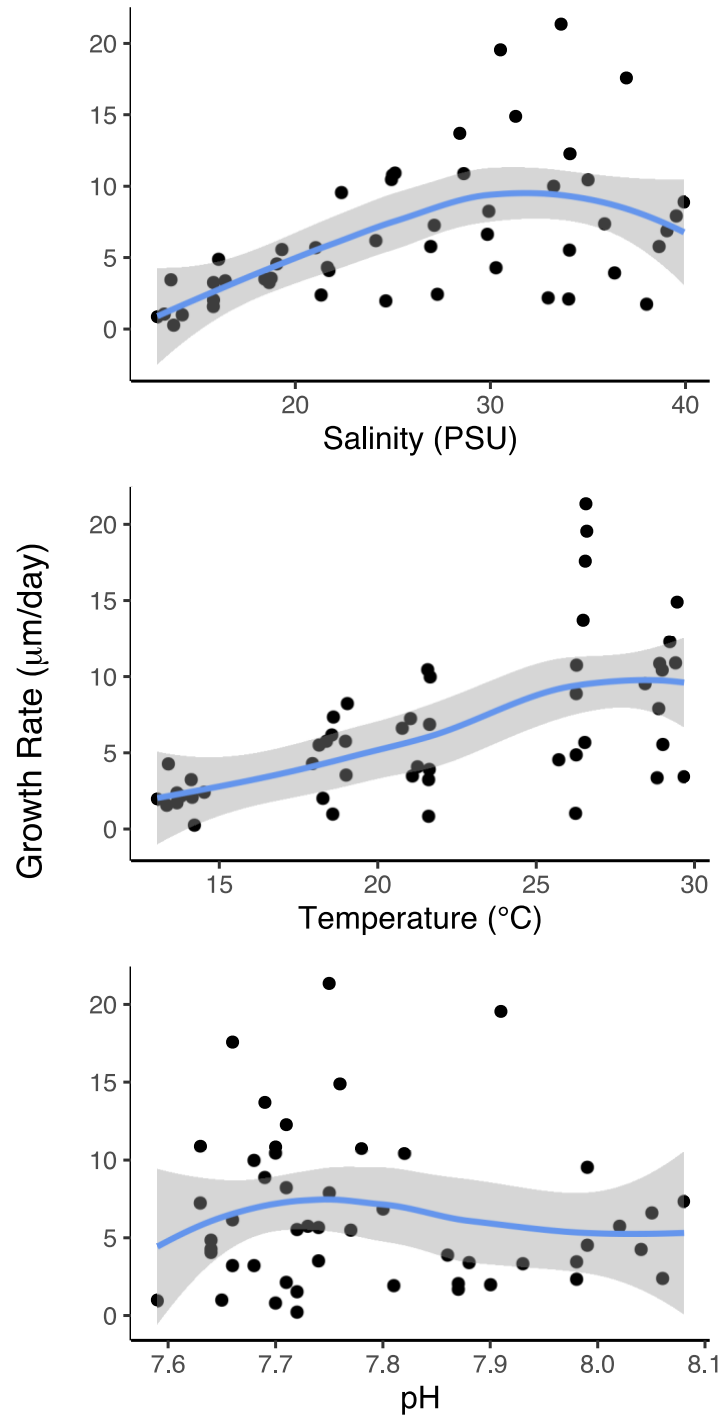

Supplementary Figure S3: Experimental growth rate distribution by variable with loess curve fits.

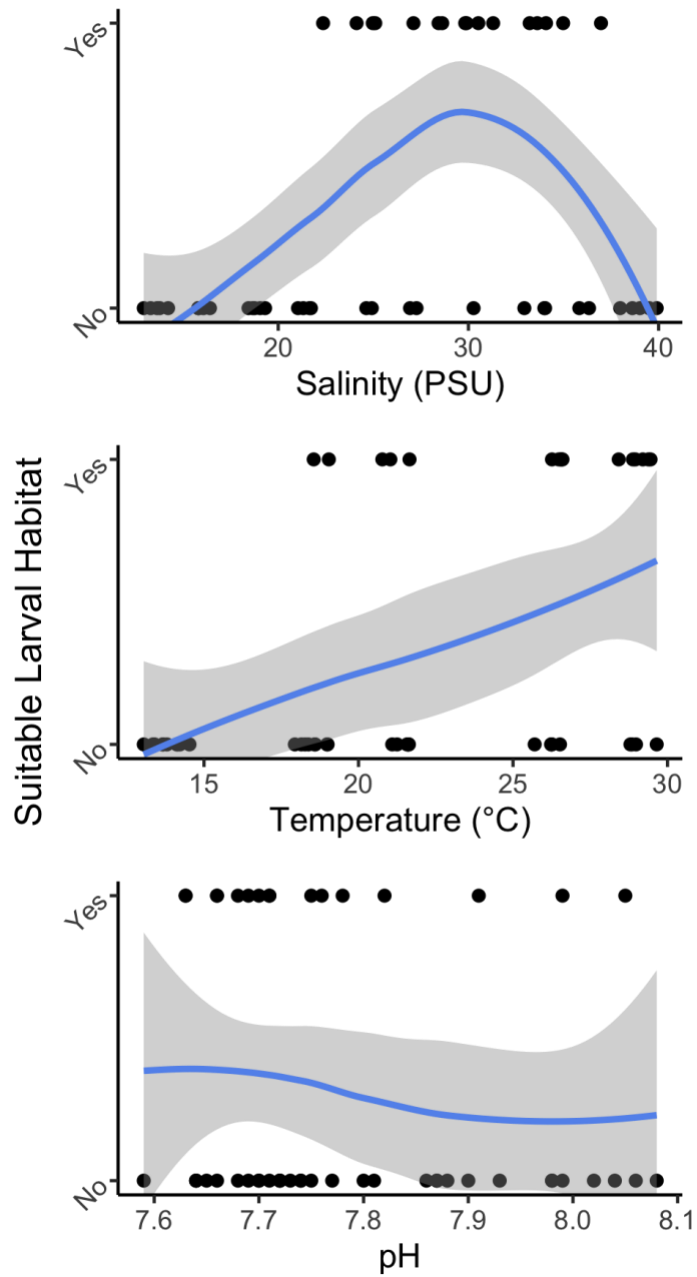

Supplementary Figure S4: Experimental larval habitat suitability by variable with loess curve fits.

### July 31, 2019 SST

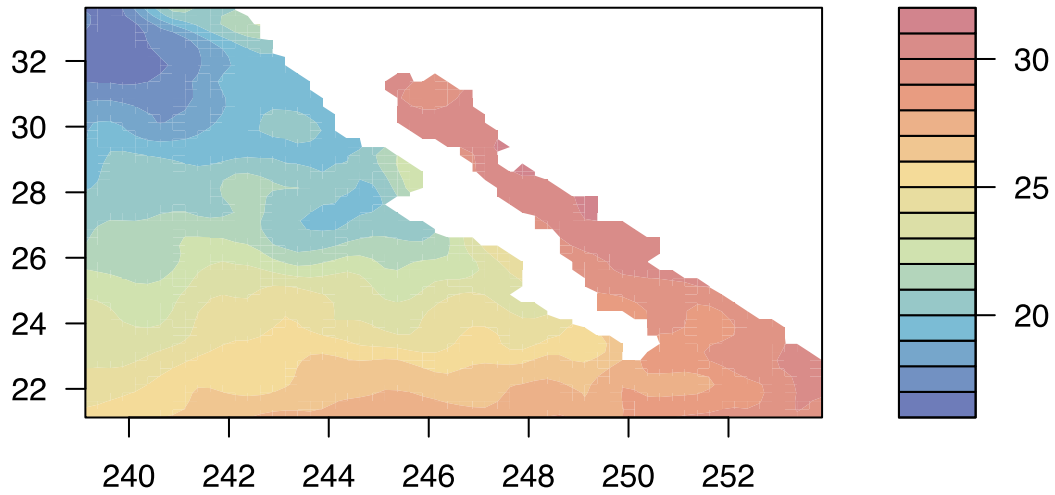

*Supplementary Figure S5: Average sea surface temperature (°C) around Baja California on July 30, 2019. Satellite data acquired from NOAA High Resolution SST, NOAA/OAR/ESRL PSD, Boulder, Colorado, USA.*

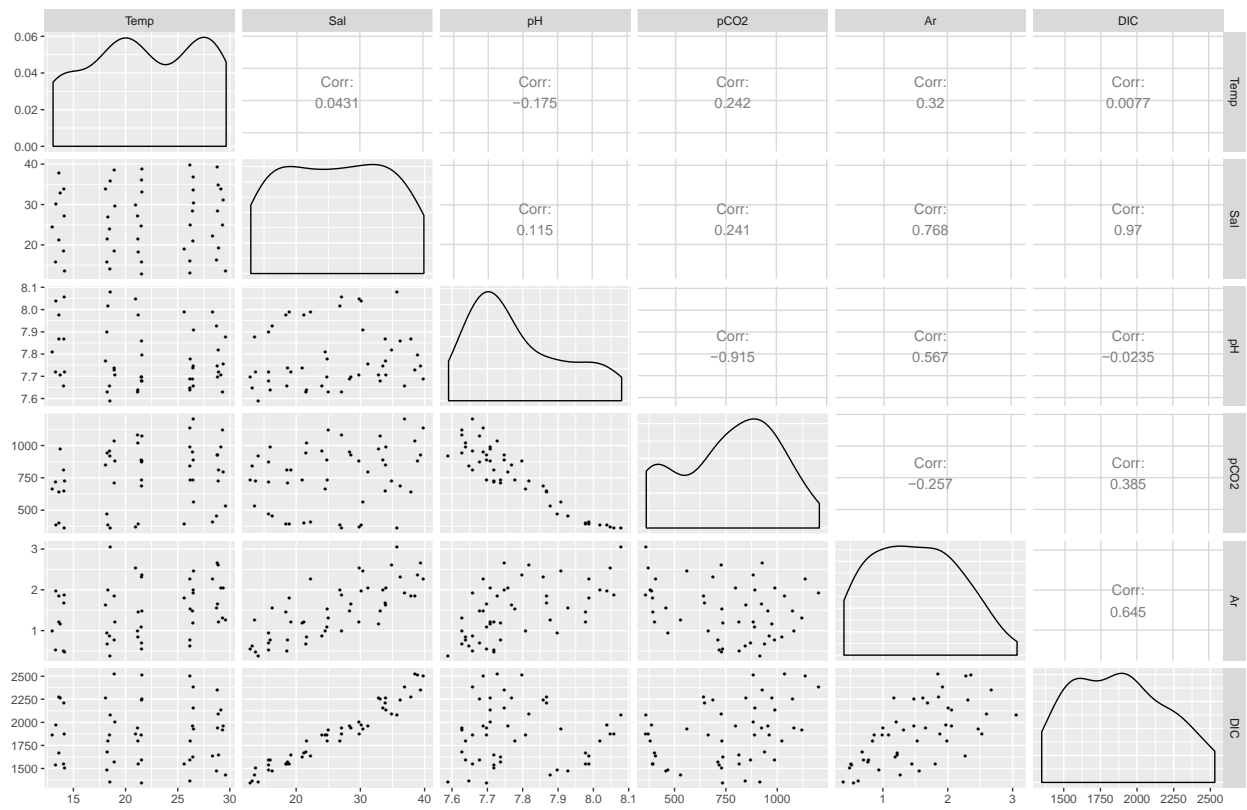

Supplementary Figure S6: Correlation matrix of predictor variables in larval growth and larval habitat suitability models.

*Supplementary Table S1: Values for 50 experimental treatments averaged over the duration of each cup's involvement in the experiment (3-17 days) with  $\pm$  SD for each value.*

| Cup Label | Temperature (°C) | Salinity (PSU) | pH          | pCO <sub>2</sub> (ppm) | Ω Ar        | DIC (μmol / kg) |
|-----------|------------------|----------------|-------------|------------------------|-------------|-----------------|
| A1        | 14.53 ± 1.7      | 27.27 ± 0.7    | 8.06 ± 0.01 | 362.51 ± 11.05         | 1.91 ± 0.06 | 1881.58 ± 27.2  |
| A2        | 13.67 ± 0.88     | 37.98 ± 0.29   | 7.87 ± 0.05 | 645.38 ± 27.9          | 1.87 ± 0.38 | 2281.12 ± 37.98 |
| A3        | 13.05 ± 0.35     | 24.63 ± 0.26   | 7.81 ± 0.11 | 667.54 ± 192.74        | 1 ± 0.2     | 1869.27 ± 24.63 |
| A4        | 13.8 ± 1.56      | 32.94 ± 0.33   | 7.71 ± 0.06 | 978.49 ± 153.42        | 1.18 ± 0.13 | 2273.43 ± 32.94 |
| A5        | 13.4 ± 0.36      | 30.27 ± 0.06   | 8.04 ± 0.03 | 391.84 ± 32.87         | 1.98 ± 0.11 | 1981.31 ± 30.27 |
| B1        | 14.12 ± 0.77     | 18.66 ± 0.1    | 7.66 ± 0.04 | 818.34 ± 64.24         | 0.52 ± 0.03 | 1550.27 ± 18.66 |
| B2        | 14.22 ± 1.64     | 13.77 ± 2.21   | 7.72 ± 0.04 | 732.91 ± 66.45         | 0.5 ± 0.11  | 1506.84 ± 13.77 |
| B3        | 14.15 ± 1.46     | 33.99 ± 3.41   | 7.87 ± 0.03 | 649.05 ± 29.25         | 1.7 ± 0.28  | 2213.54 ± 33.99 |
| B4        | 13.35 ± 0.35     | 15.8 ± 0.39    | 7.72 ± 0.03 | 722.02 ± 26.1          | 0.53 ± 0.07 | 1539.42 ± 15.8  |
| B5        | 13.67 ± 0.7      | 21.32 ± 0.03   | 7.98 ± 0.05 | 406.71 ± 55.29         | 1.23 ± 0.11 | 1676.14 ± 21.32 |
| C1        | 18.58 ± 0.59     | 14.21 ± 2.24   | 7.59 ± 0.03 | 918.9 ± 84.17          | 0.4 ± 0.09  | 1355.29 ± 14.21 |
| C2        | 18.27 ± 0.15     | 15.81 ± 0.08   | 7.9 ± 0.05  | 471.32 ± 68.34         | 0.95 ± 0.08 | 1484.76 ± 15.81 |
| C3        | 18.6 ± 0.69      | 35.83 ± 0.57   | 8.08 ± 0.02 | 363.77 ± 19.37         | 3.07 ± 0.3  | 2082.06 ± 35.83 |
| C4        | 17.94 ± 1.91     | 21.64 ± 0.17   | 7.64 ± 0.04 | 926.82 ± 88.65         | 0.7 ± 0.06  | 1683.15 ± 21.65 |
| C5        | 18.38 ± 1.72     | 26.93 ± 0.23   | 8.02 ± 0.02 | 385.4 ± 26.09          | 2 ± 0.12    | 1805.93 ± 26.93 |
| D1        | 18.98 ± 0.96     | 38.62 ± 0.2    | 7.73 ± 0.06 | 1038.91 ± 135.38       | 1.86 ± 0.25 | 2530.58 ± 38.62 |
| D2        | 18.15 ± 0.07     | 34.03 ± 0.15   | 7.77 ± 0.02 | 850.67 ± 70.7          | 1.63 ± 0.01 | 2270.58 ± 34.03 |
| D3        | 19 ± 0.89        | 18.76 ± 0.11   | 7.74 ± 0.03 | 715.11 ± 42.53         | 0.78 ± 0.05 | 1571.28 ± 18.76 |
| D4        | 18.55 ± 1.55     | 24.12 ± 0.42   | 7.66 ± 0.03 | 964.79 ± 79.56         | 0.88 ± 0.08 | 1865.15 ± 24.12 |
| D5        | 19.04 ± 0.93     | 29.9 ± 0.45    | 7.71 ± 0.02 | 886.53 ± 42.44         | 1.22 ± 0.05 | 2008.19 ± 29.9  |
| E1        | 20.77 ± 1.15     | 29.83 ± 0.58   | 8.05 ± 0.02 | 370.51 ± 22.76         | 2.54 ± 0.1  | 1876.01 ± 29.93 |
| E2        | 21.65 ± 0.24     | 33.22 ± 0.53   | 7.68 ± 0.03 | 1078.68 ± 83.8         | 1.49 ± 0.09 | 2260.58 ± 33.22 |
| E3        | 21.03 ± 0.9      | 27.11 ± 0.45   | 7.63 ± 0.03 | 1083.7 ± 73.06         | 1 ± 0.09    | 1949.39 ± 27.2  |
| E4        | 21.57 ± 0.25     | 24.92 ± 0.06   | 7.7 ± 0.01  | 893.76 ± 19.41         | 1.1 ± 0.03  | 1872.38 ± 24.92 |
| E5        | 21.25 ± 0.79     | 21.72 ± 0.25   | 7.64 ± 0.06 | 1026.1 ± 134.63        | 0.85 ± 0.09 | 1806.31 ± 21.72 |
| F1        | 21.63 ± 0.25     | 39.02 ± 0.18   | 7.8 ± 0.05  | 887.29 ± 75            | 2.37 ± 0.32 | 2516.56 ± 39.02 |
| F2        | 21.6 ± NA        | 12.93 ± NA     | 7.7 ± NA    | 737.68 ± NA            | 0.56 ± NA   | 1349.46 ± 12.93 |
| F3        | 21.09 ± 1        | 18.44 ± 0.3    | 7.98 ± 0.02 | 406.76 ± 25.1          | 1.43 ± 0.14 | 1553.74 ± 18.52 |
| F4        | 21.62 ± 0.27     | 36.34 ± 0.33   | 7.86 ± 0.04 | 690.39 ± 28.77         | 2.32 ± 0.31 | 2249.3 ± 36.34  |
| F5        | 21.6 ± 0.2       | 15.81 ± 0.34   | 7.68 ± 0.04 | 872.8 ± 86.13          | 0.71 ± 0.07 | 1601.65 ± 15.81 |
| G1        | 26.23 ± 0.72     | 13.29 ± 0.25   | 7.65 ± 0.01 | 847.26 ± 41.14         | 0.63 ± 0.03 | 1370.82 ± 13.29 |
| G2        | 26.52 ± 0.52     | 21.04 ± 1.42   | 7.74 ± 0.02 | 738.53 ± 38.22         | 1.2 ± 0.13  | 1629.59 ± 21.04 |
| G3        | 25.7 ± 1.39      | 19.05 ± 0.59   | 7.99 ± 0.04 | 397.33 ± 57.34         | 1.82 ± 0.15 | 1558.96 ± 19.05 |
| G4        | 26.57 ± 0.58     | 33.62 ± 0.33   | 7.75 ± 0.04 | 895.3 ± 79.04          | 2.02 ± 0.12 | 2159.81 ± 33.62 |
| G5        | 26.6 ± 0.61      | 30.52 ± 0.06   | 7.91 ± 0.12 | 563.93 ± 181.29        | 2.48 ± 0.55 | 1929.4 ± 30.52  |
| H1        | 26.25 ± 0.73     | 16.07 ± 0.13   | 7.64 ± 0.04 | 991.17 ± 75.4          | 0.79 ± 0.08 | 1600.56 ± 16.07 |
| H2        | 26.48 ± 0.55     | 28.43 ± 0.31   | 7.69 ± 0.03 | 957.28 ± 67.96         | 1.49 ± 0.09 | 1966.96 ± 28.43 |
| H3        | 26.26 ± 0.57     | 24.97 ± 0.23   | 7.78 ± 0.03 | 734.55 ± 55.48         | 1.54 ± 0.09 | 1808.31 ± 24.97 |
| H4        | 26.25 ± 0.87     | 39.9 ± 0.56    | 7.69 ± 0.05 | 1140.5 ± 95.24         | 2.29 ± 0.42 | 2508.28 ± 39.9  |
| H5        | 26.55 ± 0.48     | 36.97 ± 0.36   | 7.66 ± 0.03 | 1205.3 ± 26.04         | 1.93 ± 0.2  | 2391.48 ± 36.97 |
| I1        | 28.98 ± 1.33     | 19.31 ± 0.51   | 7.72 ± 0.05 | 817.17 ± 116.31        | 1.23 ± 0.07 | 1654.23 ± 19.31 |
| I2        | 29.45 ± 0.76     | 31.3 ± 0.26    | 7.76 ± 0.05 | 800.5 ± 113.17         | 2.07 ± 0.17 | 1970.09 ± 31.3  |
| I3        | 29.2 ± 0.83      | 34.08 ± 0.78   | 7.71 ± 0.08 | 992.82 ± 210.96        | 2.07 ± 0.25 | 2145.07 ± 34.08 |
| I4        | 29.65 ± 0.21     | 13.63 ± 0.28   | 7.88 ± 0.02 | 533.45 ± 33.63         | 1.28 ± 0    | 1433.86 ± 13.63 |
| I5        | 29.38 ± 0.61     | 25.1 ± 0.19    | 7.63 ± 0.01 | 1123.29 ± 46           | 1.33 ± 0.05 | 1920.18 ± 25.1  |
| J1        | 28.88 ± 0.9      | 28.62 ± 0.69   | 7.7 ± 0.01  | 927.55 ± 35.11         | 1.67 ± 0.05 | 1946.18 ± 28.62 |
| J2        | 28.42 ± 1.22     | 22.36 ± 0.37   | 7.99 ± 0.05 | 411.59 ± 56.5          | 2.28 ± 0.15 | 1635.99 ± 22.36 |
| J3        | 28.96 ± 0.79     | 34.98 ± 4.14   | 7.82 ± 0.06 | 730.55 ± 83.26         | 2.61 ± 0.6  | 2100.77 ± 34.98 |
| J4        | 28.85 ± 0.93     | 39.5 ± 0.79    | 7.75 ± 0.03 | 929.75 ± 31.98         | 2.68 ± 0.38 | 2357.61 ± 39.5  |
| J5        | 28.8 ± 1.24      | 16.41 ± 0.42   | 7.93 ± 0.01 | 460.82 ± 31.8          | 1.57 ± 0.06 | 1473.59 ± 16.41 |



Supplementary Table S2: Model selection process for larval growth Generalized Additive Model. Larval growth rate (Gr) is predicted using temperature (Temp), salinity (Sal), pH, pCO<sub>2</sub>, and aragonite saturation (Ar) using thin plate regression splines for individual variables (s()) and full tensor product splines for interacting variables (te()), both using REML smoothing. The final model is highlighted in dark grey, with the 5 next best performing models in light grey.

|                                                | Formula                                          | df                      | logLik  | AICc    | AICc Rank | BIC    | BIC Rank | R <sup>2</sup> |
|------------------------------------------------|--------------------------------------------------|-------------------------|---------|---------|-----------|--------|----------|----------------|
| Null                                           | Gr ~ 1                                           | 1                       | -146.68 | 297.62  | 43        | 301.19 | 42       | 0              |
|                                                | Gr ~ s(Temp)                                     | 2                       | -134.43 | 275.37  | 28        | 280.59 | 27       | 0.37           |
| One Predictor                                  | Gr ~ s(Sal)                                      | 3.41                    | -135.81 | 282.98  | 39        | 291.17 | 38       | 0.32           |
|                                                | Gr ~ s(pH)                                       | 2                       | -146.32 | 299.17  | 44        | 304.38 | 44       | -0.01          |
|                                                | Gr ~ s(pCO <sub>2</sub> )                        | 2.39                    | -143.49 | 295.1   | 42        | 301.38 | 43       | 0.09           |
|                                                | Gr ~ s(Ar)                                       | 2.61                    | -138.09 | 285.09  | 41        | 291.86 | 39       | 0.27           |
|                                                | Gr ~ s(Temp) + s(Sal)                            | 5.66                    | -111.71 | 242.17  | 14        | 253.68 | 15       | 0.73           |
| Two Predictors                                 | Gr ~ s(Temp) + s(pH)                             | 3                       | -134.42 | 277.74  | 31        | 284.5  | 30       | 0.36           |
|                                                | Gr ~ s(Temp) + s(pCO <sub>2</sub> )              | 3.19                    | -133    | 275.75  | 29        | 283.04 | 28       | 0.39           |
|                                                | Gr ~ s(Temp) + s(Ar)                             | 3.22                    | -129.13 | 268.17  | 25        | 275.54 | 25       | 0.48           |
|                                                | Gr ~ s(Sal) + s(pH)                              | 4.58                    | -133.51 | 281.33  | 36        | 291.03 | 37       | 0.36           |
|                                                | Gr ~ s(Sal) + s(pCO <sub>2</sub> )               | 4.63                    | -132.85 | 280.15  | 35        | 289.9  | 35       | 0.38           |
| Three Predictors                               | Gr ~ s(Temp) + s(Sal) + s(pH)                    | 6.29                    | -110.63 | 239.89  | 11        | 251.36 | 13       | 0.73           |
|                                                | Gr ~ s(Temp) + s(Sal) + s(pCO <sub>2</sub> )     | 6.28                    | -110.82 | 240.25  | 12        | 251.72 | 14       | 0.73           |
|                                                | Gr ~ te(Temp, Sal)                               | 18.95                   | -72.34  | 221.18  | 1         | 227.76 | 1        | 0.92           |
| Add Interactions                               | Gr ~ te(Temp, Sal) + s(pH)                       | 19.75                   | -72.61  | 227.35  | 6         | 231.66 | 3        | 0.92           |
|                                                | Gr ~ te(Temp, Sal) + s(pCO <sub>2</sub> )        | 19.74                   | -72.62  | 227.31  | 5         | 231.65 | 2        | 0.92           |
|                                                | Gr ~ te(Temp, pH)                                | 4                       | -134.06 | 279.48  | 34        | 287.68 | 33       | 0.36           |
|                                                | Gr ~ te(Temp, pH) + s(Sal)                       | 7.33                    | -109.8  | 241.31  | 13        | 253.79 | 16       | 0.74           |
|                                                | Gr ~ te(Temp, pCO <sub>2</sub> )                 | 4                       | -132.23 | 275.82  | 30        | 284.01 | 29       | 0.4            |
|                                                | Gr ~ te(Temp, pCO <sub>2</sub> ) + s(Sal)        | 7.26                    | -110.82 | 243.13  | 15        | 255.55 | 18       | 0.73           |
|                                                | Gr ~ te(Temp, Ar)                                | 8.08                    | -120.73 | 270.96  | 26        | 285.13 | 32       | 0.59           |
|                                                | Gr ~ te(Sal, pH)                                 | 6.13                    | -131.63 | 282.84  | 38        | 294.64 | 40       | 0.39           |
|                                                | Gr ~ te(Sal, pH) + s(Temp)                       | 8.06                    | -110.36 | 245.61  | 18        | 258.93 | 22       | 0.73           |
|                                                | Gr ~ te(Sal, pCO <sub>2</sub> )                  | 6.39                    | -131.48 | 283.01  | 40        | 294.98 | 41       | 0.39           |
|                                                | Gr ~ te(Sal, pCO <sub>2</sub> ) + s(Temp)        | 8.13                    | -110.45 | 245.65  | 19        | 258.93 | 22       | 0.73           |
|                                                | Gr ~ te(Sal, by = Temp)                          | 5.25                    | -103.53 | 222.41  | 2         | 232.57 | 4        | 0.81           |
|                                                | Gr ~ te(Sal, by = Temp) + s(pH)                  | 6.27                    | -102.59 | 223.33  | 3         | 234.63 | 5        | 0.81           |
|                                                | Gr ~ te(Sal, by = Temp) + s(pCO <sub>2</sub> )   | 6.27                    | -102.77 | 223.71  | 4         | 235.01 | 6        | 0.81           |
|                                                | Interactions Smooth by Linear                    | Gr ~ te(Temp, by = Sal) | 3       | -119.62 | 248.13    | 21     | 254.89   | 17             |
| Gr ~ te(Temp, by = Sal) + s(pH)                |                                                  | 4                       | -119.61 | 250.59  | 22        | 258.78 | 20       | 0.64           |
| Gr ~ te(Temp, by = Sal) + s(pCO <sub>2</sub> ) |                                                  | 4                       | -119.61 | 250.59  | 22        | 258.79 | 21       | 0.64           |
| Gr ~ te(Temp, by = pH)                         |                                                  | 3                       | -134.5  | 277.89  | 32        | 284.65 | 31       | 0.36           |
| Gr ~ te(Temp, by = pH) + s(Sal)                |                                                  | 6.3                     | -110.47 | 239.65  | 10        | 251.15 | 12       | 0.74           |
| Gr ~ te(Temp, by = pCO <sub>2</sub> )          |                                                  | 3                       | -132.25 | 273.39  | 27        | 280.15 | 26       | 0.41           |
| Gr ~ te(Temp, by = pCO <sub>2</sub> ) + s(Sal) |                                                  | 6.98                    | -112.09 | 247.16  | 20        | 260    | 23       | 0.71           |
| Gr ~ te(Temp, by = Ar)                         |                                                  | 4.48                    | -124.93 | 263.76  | 24        | 273.25 | 24       | 0.55           |
| Gr ~ te(Sal, by = pH)                          |                                                  | 4.46                    | -133.74 | 281.37  | 37        | 290.86 | 36       | 0.36           |
| Gr ~ te(Sal, by = pH) + s(Temp)                |                                                  | 6.01                    | -110.77 | 239.18  | 9         | 250.28 | 10       | 0.74           |
| Gr ~ te(Sal, by = pCO <sub>2</sub> )           |                                                  | 4.57                    | -132.07 | 278.24  | 33        | 287.83 | 34       | 0.4            |
| Gr ~ te(Sal, by = pCO <sub>2</sub> ) + s(Temp) |                                                  | 7.9                     | -109.58 | 244.71  | 16        | 258.17 | 19       | 0.74           |
| Two Interactions                               | Gr ~ te(Temp, pH) + te(Temp, Sal)                | 20.3                    | -78.41  | 252.24  | 23        | 250.42 | 11       | 0.89           |
|                                                | Gr ~ te(Temp, pCO <sub>2</sub> ) + te(Temp, Sal) | 17.8                    | -82.92  | 235.9   | 7         | 244.81 | 8        | 0.88           |
|                                                | Gr ~ te(Sal, pH) + te(Temp, Sal)                 | 18.83                   | -75.07  | 239.13  | 8         | 240.41 | 7        | 0.91           |
|                                                | Gr ~ te(Sal, pCO <sub>2</sub> ) + te(Temp, Sal)  | 18.91                   | -77.55  | 245.5   | 17        | 246.11 | 9        | 0.9            |

Supplementary Table S3: Model selection process for larval habitat suitability GLM. Suitability was modeled with a multiple logistic regression using temperature (Temp), salinity (Sal), pH, pCO<sub>2</sub>, and aragonite saturation (Ar) as predictor variables. Model comparisons used AICc, BIC, and McFadden's Adjusted Pseudo R<sup>2</sup>. The final model is highlighted in dark grey, with the 5 preceding (by AICc) in light grey.

|                             | Formula                                                                            | AICc         | AICc Rank | BIC          | BIC Rank | Pseudo R <sup>2</sup> |
|-----------------------------|------------------------------------------------------------------------------------|--------------|-----------|--------------|----------|-----------------------|
| Null                        | Suitability ~ NULL                                                                 | 64.77        | 48        | 66.6         | 42       | -0.03                 |
|                             | Suitability ~ Temp                                                                 | 55.49        | 20        | 59.06        | 15       | 0.12                  |
| One Predictor               | Suitability ~ Sal                                                                  | 62.26        | 42        | 65.83        | 38       | 0.01                  |
|                             | Suitability ~ pH                                                                   | 65.74        | 49        | 69.31        | 47       | -0.04                 |
|                             | Suitability ~ pCO <sub>2</sub>                                                     | 62.83        | 45        | 66.4         | 41       | 0                     |
|                             | Suitability ~ Ar                                                                   | 62.63        | 44        | 66.2         | 39       | 0                     |
|                             | Suitability ~ Temp + Sal                                                           | 52.66        | 14        | 57.88        | 14       | 0.17                  |
| Two Predictors              | Suitability ~ Temp + pH                                                            | 57.25        | 32        | 62.46        | 23       | 0.1                   |
|                             | Suitability ~ Temp + pCO <sub>2</sub>                                              | 55.57        | 21        | 60.78        | 16       | 0.12                  |
|                             | Suitability ~ Temp + Ar                                                            | 56.37        | 27        | 61.59        | 21       | 0.11                  |
|                             | Suitability ~ Sal + pH                                                             | 62.59        | 43        | 67.81        | 44       | 0.01                  |
|                             | Suitability ~ Sal + pCO <sub>2</sub>                                               | 62.15        | 41        | 67.36        | 43       | 0.02                  |
| Three Predictors            | Suitability ~ Temp + Sal + pH                                                      | 54.46        | 18        | 61.22        | 20       | 0.15                  |
|                             | Suitability ~ Temp + Sal + pCO <sub>2</sub>                                        | 54.45        | 17        | 61.21        | 19       | 0.15                  |
|                             | Suitability ~ Temp + Temp <sup>2</sup>                                             | 56.97        | 31        | 62.18        | 22       | 0.1                   |
|                             | Suitability ~ Sal + Sal <sup>2</sup>                                               | 44.89        | 13        | 50.11        | 13       | 0.29                  |
|                             | Suitability ~ Temp + Temp <sup>2</sup> + Sal                                       | 54.3         | 16        | 61.06        | 18       | 0.15                  |
| One Quadratic Term          | Suitability ~ Temp + Temp <sup>2</sup> + pH                                        | 58.98        | 39        | 65.73        | 37       | 0.07                  |
|                             | Suitability ~ Temp + Temp <sup>2</sup> + pCO <sub>2</sub>                          | 57.52        | 34        | 64.28        | 28       | 0.1                   |
|                             | Suitability ~ Temp + Temp <sup>2</sup> + Ar                                        | 57.84        | 35        | 64.59        | 33       | 0.09                  |
|                             | Suitability ~ Sal + Sal <sup>2</sup> + pH                                          | 41.95        | 12        | 48.71        | 12       | 0.34                  |
|                             | Suitability ~ Sal + Sal <sup>2</sup> + pCO <sub>2</sub>                            | 41.12        | 11        | 47.88        | 11       | 0.36                  |
|                             | <b>Suitability ~ Sal + Sal<sup>2</sup> + Temp</b>                                  | <b>21.77</b> | <b>1</b>  | <b>28.53</b> | <b>1</b> | <b>0.67</b>           |
|                             | Suitability ~ Temp + Temp <sup>2</sup> + Sal + pH                                  | 56.36        | 26        | 64.56        | 31       | 0.12                  |
|                             | Suitability ~ Temp + Temp <sup>2</sup> + Sal + pCO <sub>2</sub>                    | 56.39        | 28        | 64.58        | 32       | 0.12                  |
|                             | Suitability ~ Sal + Sal <sup>2</sup> + Temp + pH                                   | 22.35        | 3         | 30.55        | 3        | 0.67                  |
|                             | Suitability ~ Sal + Sal <sup>2</sup> + Temp + pCO <sub>2</sub>                     | 21.88        | 2         | 30.07        | 2        | 0.67                  |
| Two Quadratic Terms         | Suitability ~ Sal + Sal <sup>2</sup> + Temp + Temp <sup>2</sup>                    | 24.24        | 7         | 32.44        | 5        | 0.64                  |
|                             | Suitability ~ Sal + Sal <sup>2</sup> + Temp + Temp <sup>2</sup> + pH               | 24.65        | 9         | 34.17        | 9        | 0.64                  |
|                             | Suitability ~ Sal + Sal <sup>2</sup> + Temp + Temp <sup>2</sup> + pCO <sub>2</sub> | 24.16        | 6         | 33.68        | 7        | 0.65                  |
|                             | Suitability ~ Temp + Sal + Temp * Sal                                              | 54.12        | 15        | 60.88        | 17       | 0.15                  |
|                             | Suitability ~ Temp + Sal + Temp * Sal + pH                                         | 56.33        | 25        | 64.53        | 30       | 0.12                  |
|                             | Suitability ~ Temp + Sal + Temp * Sal + pCO <sub>2</sub>                           | 56.29        | 24        | 64.48        | 29       | 0.12                  |
|                             | Suitability ~ Temp + pH + Temp * pH                                                | 59.56        | 40        | 66.32        | 40       | 0.06                  |
| Interactions                | Suitability ~ Temp + pH + Temp * pH + Sal                                          | 56.06        | 23        | 64.26        | 27       | 0.13                  |
|                             | Suitability ~ Temp + pCO <sub>2</sub> + Temp * pCO <sub>2</sub>                    | 57.85        | 36        | 64.61        | 34       | 0.09                  |
|                             | Suitability ~ Temp + pCO <sub>2</sub> + Temp * pCO <sub>2</sub> + Sal              | 56.45        | 29        | 64.64        | 35       | 0.12                  |
|                             | Suitability ~ Temp + Ar + Temp * Ar                                                | 57.49        | 33        | 64.25        | 26       | 0.1                   |
|                             | Suitability ~ Sal + pH + Sal * pH                                                  | 63.44        | 46        | 70.2         | 48       | 0                     |
|                             | Suitability ~ Sal + pH + Sal * pH + Temp                                           | 56.89        | 30        | 65.09        | 36       | 0.11                  |
|                             | Suitability ~ Sal + pCO <sub>2</sub> + Sal * pCO <sub>2</sub>                      | 64.2         | 47        | 70.96        | 49       | -0.01                 |
|                             | Suitability ~ Sal + pCO <sub>2</sub> + Sal * pCO <sub>2</sub> + Temp               | 55.02        | 19        | 63.22        | 24       | 0.14                  |
|                             | Suitability ~ Temp + Sal + Temp * Sal + Temp <sup>2</sup>                          | 56.01        | 22        | 64.2         | 25       | 0.13                  |
| Quadratic with Interactions | Suitability ~ Temp + Sal + Temp * Sal + Sal <sup>2</sup>                           | 23.5         | 4         | 31.7         | 4        | 0.65                  |
|                             | Suitability ~ Temp + Sal + Temp * Sal + pH + Temp <sup>2</sup>                     | 58.41        | 38        | 67.93        | 46       | 0.1                   |
|                             | Suitability ~ Temp + Sal + Temp * Sal + pH + Sal <sup>2</sup>                      | 24.51        | 8         | 34.03        | 8        | 0.64                  |
|                             | Suitability ~ Temp + Sal + Temp * Sal + pCO <sub>2</sub> + Temp <sup>2</sup>       | 58.39        | 37        | 67.91        | 45       | 0.1                   |
|                             | Suitability ~ Temp + Sal + Temp * Sal + pCO <sub>2</sub> + Sal <sup>2</sup>        | 24.15        | 5         | 33.67        | 6        | 0.65                  |
|                             | Suitability ~ Temp + Temp <sup>2</sup> + Sal + Sal <sup>2</sup> + Temp * Sal       | 26.09        | 10        | 35.61        | 10       | 0.61                  |

*Supplementary Table S4: Case study field data from two restoration sites in Washington State between the years 2014 and 2019. Field data are listed on the left, and modeled response variables on the right of the vertical line. Values for °C and PSU are depth-averaged means ± sd.*

| <b>Site</b> | <b>Year</b> | <b>°C</b>    | <b>PSU</b>   | <b>Dates</b>   | <b>Sample Frequency</b>             | <b>Instrument</b>    | <b>Coordinates</b>     | <b>Growth Rate<br/>(µm/day)</b> | <b>PLD<br/>(days)</b> | <b>Habitat Suitability<br/>Likelihood %</b> |
|-------------|-------------|--------------|--------------|----------------|-------------------------------------|----------------------|------------------------|---------------------------------|-----------------------|---------------------------------------------|
| Liberty Bay | 2017        | 16.44 ± 0.59 | 29.09 ± 0.58 | Jul. 7-Aug. 23 | Twice weekly through water column   | Pro Plus YSI         | 47.734°N<br>122.648°W  | 4.88                            | 21.3                  | 31.12                                       |
| Liberty Bay | 2018        | 17.36 ± 1.15 | 29.58 ± 2.43 | Jul. 7-Aug. 23 | Twice weekly through water column   | Pro Plus YSI         | 47.734°N<br>122.648°W  | 5.59                            | 18.6                  | 49.9                                        |
| Liberty Bay | 2019        | 16.71 ± 1.07 | 27.7 ± 0.81  | Jul. 7-Aug 23  | Twice weekly through water column   | Pro Plus YSI         | 47.734°N<br>122.648°W  | 5.12                            | 20.3                  | 26.65                                       |
| Fidalgo Bay | 2017        | 16.6 ± 1.3   | 29 ± NA      | Jul. 11-14     | 11 times daily through water column | Hatch DS5 Multiprobe | 48.4823°N<br>122.580°W | 5.01                            | 20.7                  | 33.66                                       |
| Fidalgo Bay | 2014        | 16.5 ± 0.5   | 28.4 ± 0.25  | Jul. 2, 14     | Once daily through water column     | Hatch DS5 Multiprobe | 48.4789°N<br>122.579°W | 4.94                            | 21.0                  | 28.8                                        |

*Supplementary Table S5: Mean temperature and salinity from the Salish Sea Hydrodynamic Model from July 5- August 23, 2014 and 2095 in the 19 state-managed Olympia oyster restoration sites in Washington State with average model-predicted PLD in each site for each year. The final two columns show change in projected PLD in days and as percentages between 2014 and 2095. White rows were those where site temperatures were outside the limits of our GAM (<13°C), so were removed.*

| Site              | 2014  |      |      | 2095  |      |      | Δ PLD |       |
|-------------------|-------|------|------|-------|------|------|-------|-------|
|                   | Temp. | Sal. | PLD  | Temp. | Sal. | PLD  | days  | %     |
| Bellingham Bay    | 13.6  | 26.5 | 41.6 | 16.5  | 25.9 | 21.7 | -19.9 | -47.8 |
| Budd Inlet        | 15    | 25.3 | 29.2 | 16.5  | 26   | 21.5 | -7.7  | -26.4 |
| Discovery Bay     | 10.8  | 31   | --   | 14.8  | 28.8 | --   | --    | --    |
| Drayton Harbor    | 11.3  | 28.8 | --   | 14.2  | 28.3 | --   | --    | --    |
| Dyes Inlet        | 13.5  | 28.8 | 44.5 | 16.9  | 28.4 | 19.7 | -24.8 | -55.7 |
| Fidalgo Bay       | 12.7  | 28   | --   | 16.2  | 26.4 | --   | --    | --    |
| Henderson Bay     | 14    | 27.8 | 37.5 | 16.6  | 27.7 | 20.6 | -16.9 | -45.1 |
| Kilisut Harbor    | 10.9  | 30.5 | --   | 14.4  | 29   | --   | --    | --    |
| Liberty Bay       | 12.5  | 28.8 | --   | 15.9  | 28.5 | --   | --    | --    |
| Padilla Bay       | 12.6  | 27.7 | --   | 16.6  | 26   | --   | --    | --    |
| Port Gamble Bay   | 12.3  | 30.2 | --   | 15.2  | 29   | --   | --    | --    |
| Port Orchard Pass | 13    | 28.8 | 53.2 | 15.9  | 28.3 | 23.2 | -30   | -56.4 |
| Quilcene Bay      | 10.9  | 29.8 | --   | 13.7  | 28.9 | --   | --    | --    |
| Samish Bay        | 13.1  | 27.9 | 50.6 | 17.5  | 26.2 | 18.5 | -32.1 | -63.4 |
| Sequim Bay        | 11.2  | 30.5 | --   | 15.7  | 28   | --   | --    | --    |
| Similk Bay        | 12.1  | 26.8 | --   | 14.7  | 27.1 | --   | --    | --    |
| Sinclair Inlet    | 13.4  | 28.6 | 45.5 | 16.3  | 28.4 | 21.7 | -23.8 | -52.3 |
| Squaxin Island    | 13.5  | 28.6 | 44.1 | 15.9  | 28.1 | 23.2 | -20.9 | -47.4 |
| Union River       | 15.4  | 28.1 | 25.8 | 19.4  | 27.8 | 14.2 | -11.6 | -45   |
